# Supplementary material for: The Silver Trauma Review Clinic: A novel model of care to manage non-operative injuries in older patients
Source: bioRxiv or medRxiv preprint supplement (doi:10.1101/2023.02.27.23286493), 2023-03-01
Supplement: Supplementary file [file media-1.pdf]

**Silver Trauma Review Clinic**

**Patient Name:**

**MRN :**

**Date:**

**Assessor name and designation:**

**TRAUMA ASSESSMENT**

|                                                                                                                            |                                                           |
|----------------------------------------------------------------------------------------------------------------------------|-----------------------------------------------------------|
| <b>Name:</b><br><b>MRN:</b><br><b>Address:</b><br><br><b>DOB:</b><br><b>Phone numbers:</b><br><b>NOK Ph:</b><br><b>GP:</b> | <b>Date of Injury:</b><br><br><b>MECHANISM OF INJURY:</b> |
|----------------------------------------------------------------------------------------------------------------------------|-----------------------------------------------------------|

|                                     |                                      |
|-------------------------------------|--------------------------------------|
| <b>INJURIES: PRIMARY ASSESSMENT</b> | <b>INJURIES SECONDARY ASSESSMENT</b> |
|-------------------------------------|--------------------------------------|

|                                  |                                  |
|----------------------------------|----------------------------------|
| 1.<br>2.<br>3.<br>4.<br>5.<br>6. | 1.<br>2.<br>3.<br>4.<br>5.<br>6. |
|----------------------------------|----------------------------------|

|                              |                     |
|------------------------------|---------------------|
| <b>Past Medical history:</b> | <b>Medications:</b> |
|------------------------------|---------------------|

|                 |                |
|-----------------|----------------|
| <b>Imaging:</b> | <b>Issues:</b> |
|-----------------|----------------|

**INVESTIGATIONS REQUIRED**

Bloods: Geriatric Screen Y  N

Imaging: Further imaging required: Y  N

Other: ECG Y  N

**Silver Trauma Review Clinic****Patient Name:****MRN :****Date:****Assessor name and designation:****CURRENT ISSUES****Pain:**

Location, aggravating factors, analgesia

Pain score: 0  1  2  3  4  5  6  7  8  9  10 **Medications**Paracetamol Y  N Codeine Y  N NSAIDs Y  N Opiates Y  N Neuropathic Y  N Topical Agents Y  N Capsaicin Y  N Pain patches Y  N Sleeping tablets Y  N Heat/Ice Y  N TENS Y  N 

Others:

**Psychosocial/Mood:**Do you feel depressed or low? Y  N Flashbacks  Night terrors Are you lonely/isolated? Y  N **Sleeping Pattern**Disturbed Y  N Slightly < 1h  Mild 1-2h  Moderate 2-3h  Severe 3-4h  Completely > 4 h **Recent behaviour change/Agitation/Aggression**Y  N **Constipation**Y  N Laxatives Y  N **PLAN**

Pain Management

Imaging

 Physiotherapy   
 Plastic Surgery   
 Orthopaedics   
 Thoracic Surgery   
 Other 
**FOLLOW UP:**Review in STRC  When?RAC COTOP Day Ward PCT Fracture clinic

**Silver Trauma Review Clinic**

**Patient Name:**

**MRN :**

**Date:**

**Assessor name and designation:**

**BONE HEALTH**

Weight: kg  
Height: cm

Smoking: Y  Ex  N

Alcohol: units/week

Dairy intake:

Calcium/Vit D Supplementation:

Previous fracture Y  N

If yes: location?

1<sup>st</sup> degree family history of hip fracture or osteoporosis? Y  N

Age of Menarche:

Age of Menopause:

Current Treatment:

Compliance:

**Secondary Osteoporosis**

Long term steroid use. Y

T1DM Y

Hyperthyroidism Y

Cushing's Disease Y

Coeliac or absorption disorder Y

IBD Y

CKD Y

Eating disorder Y

Chronic Liver disease Y

Rheumatoid Arthritis Y

**DEXA**

Previous DEXA Scan results :

**FRAX Score**

<https://www.sheffield.ac.uk/FRAX/tool.aspx?country=48>

**Cognitive Screen**

Mini Cog Normal  Abnormal

**Clinical Frailty Scale**

CFS Score:

**GERIATRICIAN ASSESSMENT**

**Silver Trauma Review Clinic**

**Patient Name:**

**MRN :**

**Date:**

**Assessor name and designation:**

| Falls Screen                                                                                                                                                                                                                                                                                                                                                                                                                                                                                                                                                                                                                                                                                                                                                                                                                                                                                                                                                                                                                                                                 | Ax of Orthostatic Hypertension                                                                                                                                                                                                                                                                                                                                                                                                                                                                                                       |
|------------------------------------------------------------------------------------------------------------------------------------------------------------------------------------------------------------------------------------------------------------------------------------------------------------------------------------------------------------------------------------------------------------------------------------------------------------------------------------------------------------------------------------------------------------------------------------------------------------------------------------------------------------------------------------------------------------------------------------------------------------------------------------------------------------------------------------------------------------------------------------------------------------------------------------------------------------------------------------------------------------------------------------------------------------------------------|--------------------------------------------------------------------------------------------------------------------------------------------------------------------------------------------------------------------------------------------------------------------------------------------------------------------------------------------------------------------------------------------------------------------------------------------------------------------------------------------------------------------------------------|
| <p>1. In the past year have you had any other fall, including a slip or trip in which you lost your balance and landed on the floor or ground or lower level? Y <input type="checkbox"/> N <input type="checkbox"/></p> <p>a. How many times did you fall in the past year? _____</p> <p>b. How did you fall? (please describe e.g. activity, place, time):</p> <p>c. Could you get up from the floor following your fall? Y <input type="checkbox"/> N <input type="checkbox"/></p> <p>2. Are you afraid of falling? Y <input type="checkbox"/> N <input type="checkbox"/> Sometimes <input type="checkbox"/> Don't know <input type="checkbox"/></p> <p>3. Did your fall require medical intervention? (specify):</p> <p>4. Have you any difficulty with your walking or balance? (specify):</p> <p>5. Do you get Dizzy or light headed? Y <input type="checkbox"/> N <input type="checkbox"/> Is this on standing up? Y <input type="checkbox"/> N <input type="checkbox"/></p> <p>ECG Done Y <input type="checkbox"/> N <input type="checkbox"/> Comments( specify):</p> | <ul style="list-style-type: none"><li>• Lie down for 5 minutes. Take <b>BP 1</b>=</li><li>• Stand up. Take <b>BP 2</b> in 1<sup>st</sup> minute=</li><li>• After 3 minutes take <b>BP 3</b>=</li></ul> <p>Symptoms (specify):</p> <p><b>POSITIVE RESULT</b> Y <input type="checkbox"/> N <input type="checkbox"/></p> <ul style="list-style-type: none"><li>• Drop in systolic BP of 20mmHG or more.</li><li>• A drop in diastolic BP of 10mmHg or more with symptoms.</li><li>• A drop below systolic 90mmHg on standing.</li></ul> |

**PHYSIOTHERAPY MUSCULOSKELETAL ASSESSMENT**

**Special Tests :**

**Walking: TUG (>20 seconds more detailed assessment) :**

**Balance: time held on one foot (<5seconds more detailed assessment):**

**Muscle strength:5xSTS (>15 seconds more detailed ax):**

**Subjective fear of falling: Y  N**

**Arom:**

**Power:**

**Balance:**

**Gait Assessment:**

**International Exercise Recommendations for older Adults:**

**Do you get 30 mins of aerobic exercise on any day during the week?**

**Do you do resistance training on any day during the week?**

**Do you do balance training on any day during the week?**

**Assessment Summary/ Treatment Plan**

**Silver Trauma Review Clinic**

**Patient Name:**

**MRN :**

**Date:**

**Assessor name and designation:**

**Action Plan**

| Problems Identified | Actions | Completed |
|---------------------|---------|-----------|
| 1.                  |         |           |
| 2.                  |         |           |
| 3.                  |         |           |
| 4.                  |         |           |

**Patient Follow up Plan of Care**

| Interventions                                                                                                                                                                                                                                         | Follow up                                                                                                                                                                                                                                                                                         | Referrals made                                                                                                                                                                                                                                                     |
|-------------------------------------------------------------------------------------------------------------------------------------------------------------------------------------------------------------------------------------------------------|---------------------------------------------------------------------------------------------------------------------------------------------------------------------------------------------------------------------------------------------------------------------------------------------------|--------------------------------------------------------------------------------------------------------------------------------------------------------------------------------------------------------------------------------------------------------------------|
| Pain management <input type="checkbox"/><br>Immobilisation device <input type="checkbox"/><br>Bone health <input type="checkbox"/><br>Medication alteration <input type="checkbox"/><br>Falls prevention<br>Health Promotion <input type="checkbox"/> | Follow up in STR clinic Date.....<br>Discharged to GP <input type="checkbox"/><br>Discharged to Geriatric OPD <input type="checkbox"/><br>Discharged to IV Zol Clinic <input type="checkbox"/><br>Appointment made <input type="checkbox"/><br>Voice message left to Sec <input type="checkbox"/> | GP <input type="checkbox"/><br>Geriatrician <input type="checkbox"/><br>Fracture Clinic <input type="checkbox"/><br>Integrated Care Team Older Persons (ICT) <input type="checkbox"/><br>Iv Zol clinic <input type="checkbox"/><br>Others <input type="checkbox"/> |

|                                                 |              |              |
|-------------------------------------------------|--------------|--------------|
| <b>Assessor name and designation:</b> «USERIMC» | <b>Date:</b> | <b>Time:</b> |
|-------------------------------------------------|--------------|--------------|

**Silver Trauma Review Clinic**

**Patient Name:**

**MRN :**

**Date:**

**Assessor name and designation:**

**Review #1**

**Imaging/interventions:**

**Physiotherapy:**

**Advanced Nurse Practitioner:**

**Geriatrician**

**Trauma**

**Follow up plan:**
